# Supplementary material
Source: PubMed Central journal article supplement (PMC8313860)
Supplement: joces-134-257956-s1.pdf [file joces-134-257956-s1.pdf]

**Table S1: Population studies examining fertility variance (litter attributes) in dKO females.** Seven mating pairs for WT and dKO mice, and three pairs for V3KO and tKO mice were used for analysis. (Litter size  $***p < 0.001$ ; Pups/female  $**p \leq 0.005$ ; Total pups  $**p < 0.005$ , chi-square).

| Male         | x | Female       | Litters Born (to date) | Litter Size (Mean $\pm$ S.D.) | Pups/Female (36 weeks)       | Total Pups (36 weeks) |
|--------------|---|--------------|------------------------|-------------------------------|------------------------------|-----------------------|
| WT (n = 7)   | x | WT (n = 7)   | 41                     | 8.28 $\pm$ 0.41               | 48.4 $\pm$ 9.3               | 339                   |
| V3KO (n = 3) | x | V3KO (n = 3) | 18                     | 7.94 $\pm$ 1.7                | 47.7 $\pm$ 9.45              | 143                   |
| tKO (n = 3)  | x | tKO (n = 3)  | 18                     | 7.44 $\pm$ 0.98               | 44.7 $\pm$ 1.53              | 134                   |
| dKO (n = 7)  | x | dKO (n = 7)  | 40                     | 5.49 $\pm$ 1.1 <sup>***</sup> | 31.6 $\pm$ 9.4 <sup>**</sup> | 221 <sup>**</sup>     |

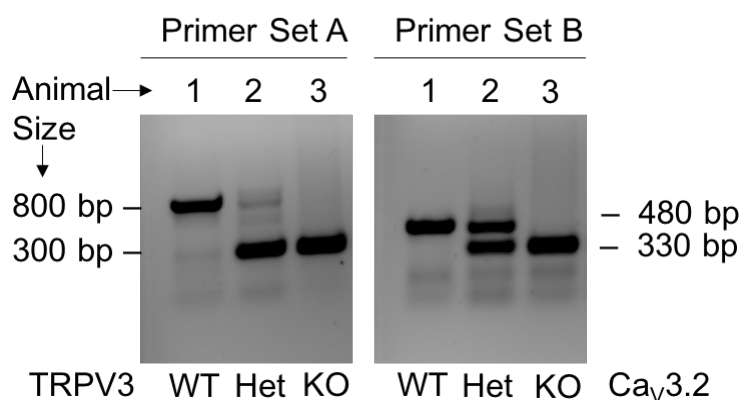

**Figure S1. PCR confirmation of targeted deletions of *Trpv3* and *Cacna1h* genes.**

PCR genotyping of wild-type (WT), heterozygous (Het), and knockout (KO) mice. Two sets of primers were used to amplify *Trpv3* and *Cacna1h* (see Methods). Products yielded from Primer Set A: WT 800 bp, Het 800 & 300 bp, KO 300 bp. Products yielded from Primer Set B: WT 480 bp, Het 480 & 330 bp, KO 330 bp.

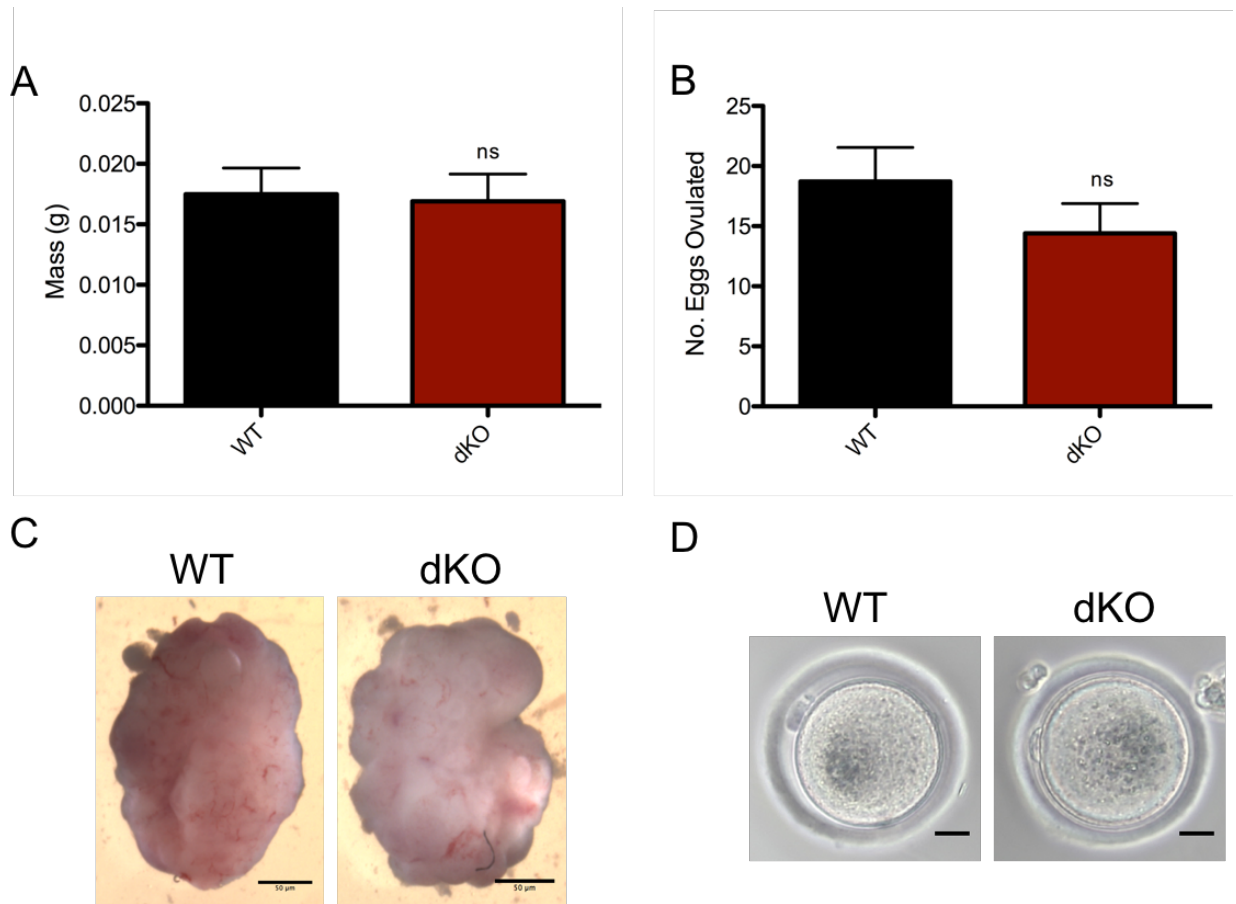

**Figure S2. Double knockout females display no morphological differences.**

A: Mean mass of superovulated ovaries. Mean  $\pm$  S.E.M. for each genotype was calculated from  $n = 28$  ovaries. B: Number of MII eggs ovulated 14 hours post-hCG injection. Mean  $\pm$  S.E.M. for each genotype was calculated from  $n = 14$  females. C: Ovaries were prepared for imaging by removing excess fat tissue and oviduct. Scale bar represents 50  $\mu$ m. D: DIC image of MII egg. Scale bars represent 10  $\mu$ m.

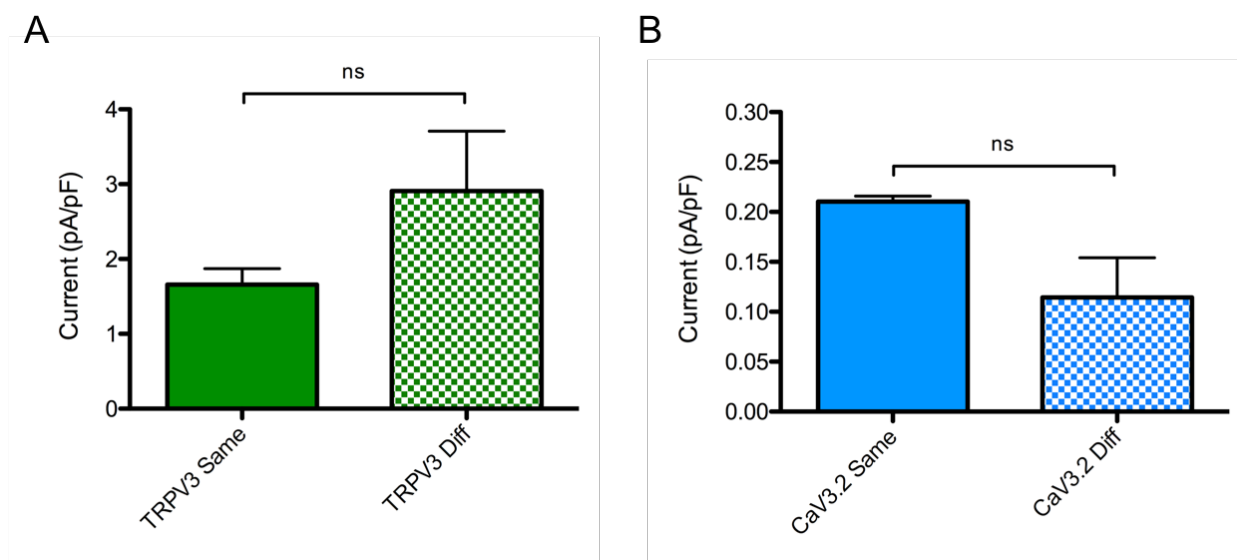

**Figure S3: Cav3.2 and subsequent TRPV3 patch clamp on the same egg confirms true dKO egg.**

The same dKO egg was subjected to a whole cell voltage clamp step protocol from -100 mV to +50 mV ( $\Delta$  10 mV) to measure Cav current and subsequently a ramp protocol from -100 mV to +100 mV to measure TRPV3 current in presence of the agonist 2-APB (200  $\mu$ M). A: TRPV3 measurements in a dKO egg immediately after measuring Cav3.2 (solid green bar, left). Mean  $\pm$  S.E.M. current =  $1.66 \pm 0.21$  pA/pF at +80 mV, n = 2 versus TRPV3 measurements in different dKO eggs (hashed green bar, right); mean  $\pm$  S.E.M. current =  $2.91 \pm 0.78$  pA/pF at +80 mV, n = 3 ( $p > 0.05$ ). B: Cav3.2 measurements in dKO eggs that remained patched after the step protocol to subsequently measure TRPV3 current (solid blue bar, left), mean  $\pm$  S.E.M. current at -20 mV =  $0.21 \pm 0.0055$  pA/pF, n = 2 versus Cav3.2 current measurements made in different dKO eggs (hashed blue bar, right), mean  $\pm$  S.E.M. current =  $0.11 \pm 0.04$  pA/pF, n = 2 ( $p > 0.05$ ).

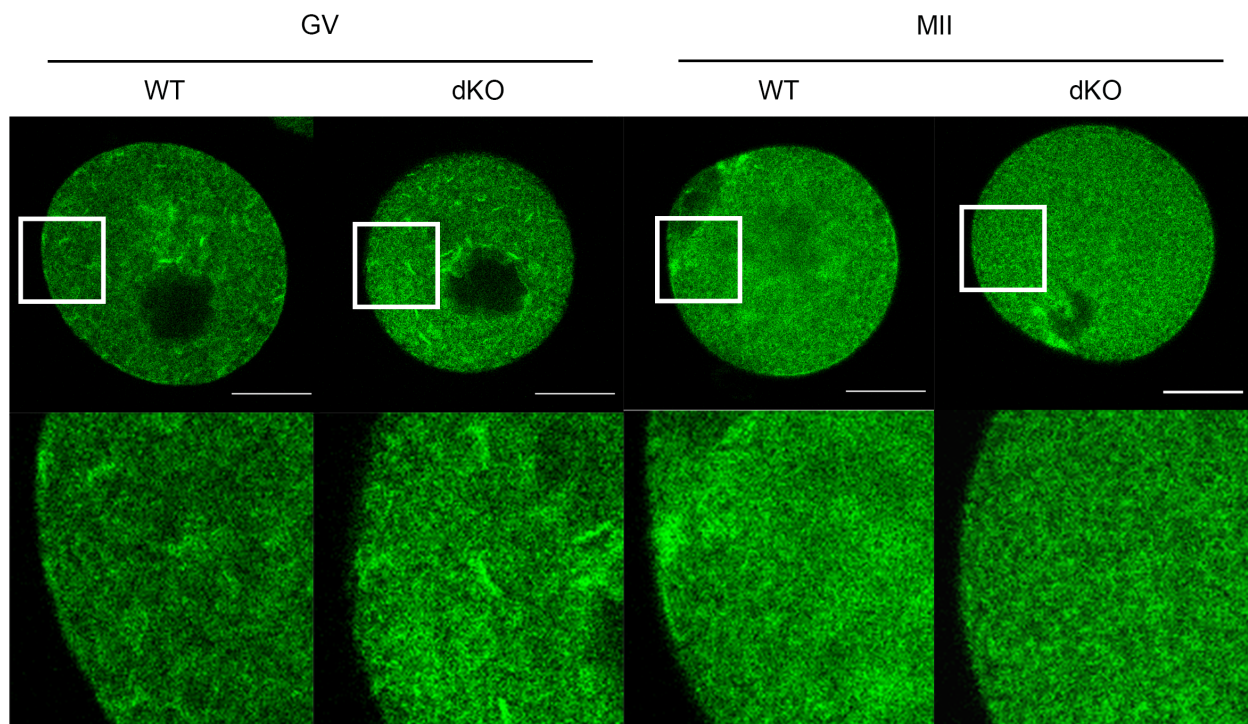

**Fig S4. Absence of TRPV3 and Ca<sub>v</sub>3.2 in dKO oocytes/eggs does not alter ER organization.**

Confocal images of WT and dKO oocytes (left) and eggs (right) expressing the ER Ca<sup>2+</sup> sensor, D1ER. Lower panels represent zoom inset corresponding to white square. Scale bars represent 25  $\mu$ m.

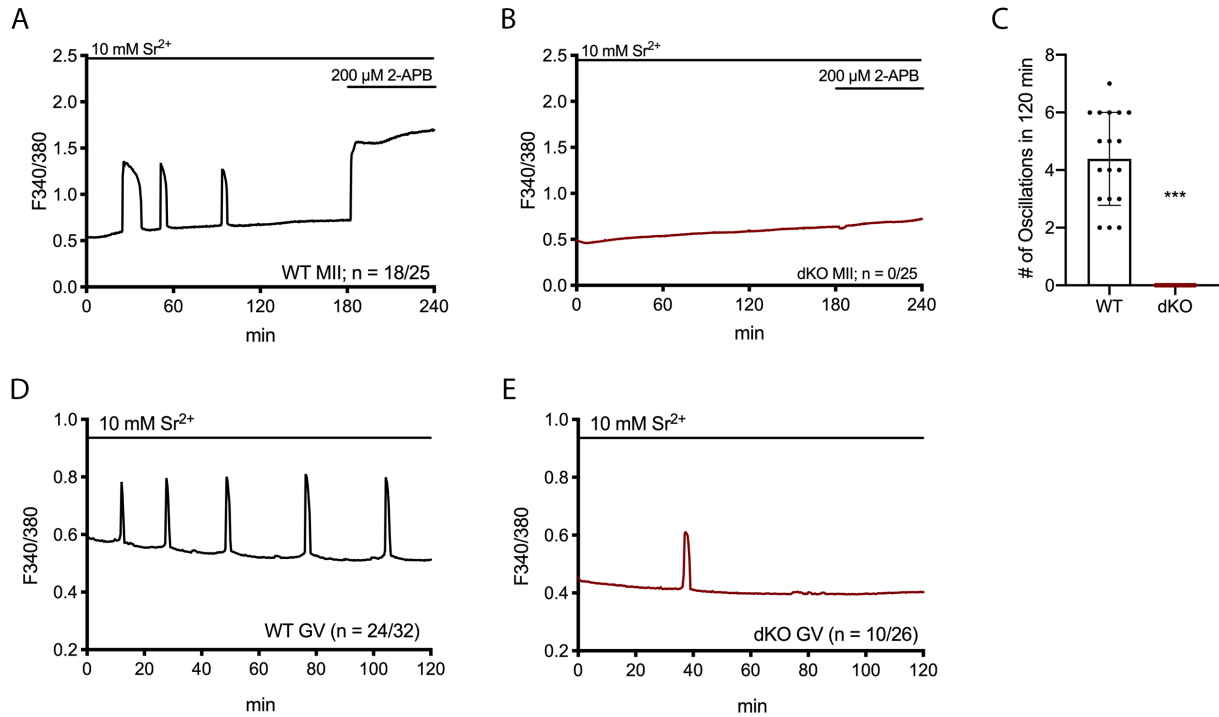

**Figure S5. dKO oocytes and eggs lacking TRPV3 and  $Ca_v3.2$  channels do not support  $Sr^{2+}$ -induced oscillations or 2-APB stimulated influx.**

A-B: Oscillations induced in MII eggs by exposure to 10 mM  $SrCl_2$ . A: WT, n = 25/29. B: dKO, n = 0/24. 200  $\mu$ M 2-APB was applied to media at 180 min. C: Number of oscillations in 120 min; WT:dKO: p < 0.001. Spontaneous oscillations induced by exposure to 10 mM  $SrCl_2$ . D: WT GV oocytes (n = 6/8). E: dKO GV oocytes. Representative dKO oocytes (n = 3/8).

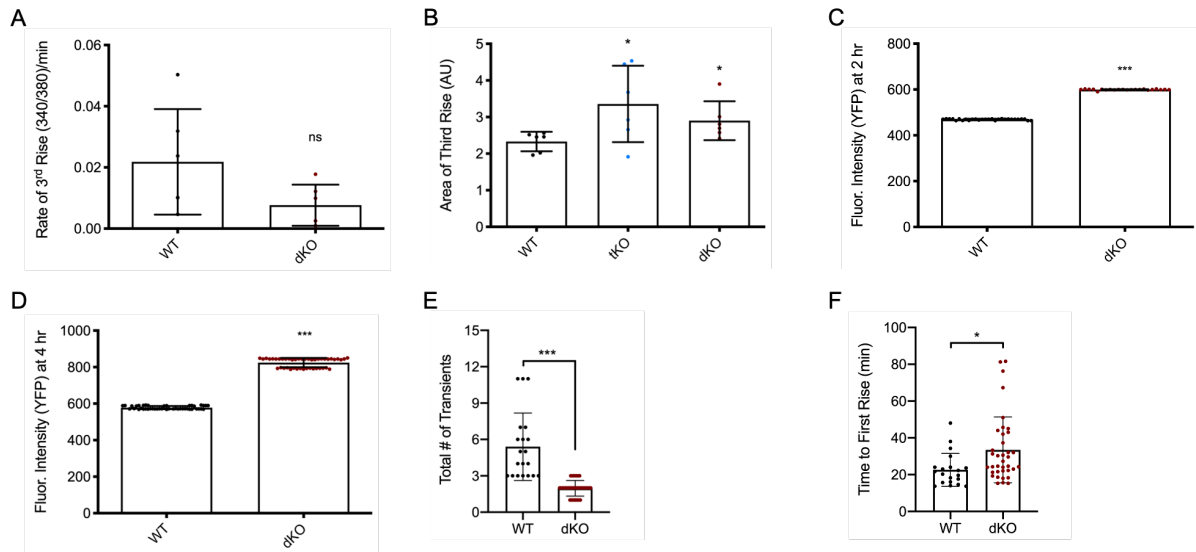

**Figure S6. Slower Ca<sup>2+</sup> influx underlies slower oscillations after PLC $\zeta$  cRNA-initiated oscillations or IVF in dKO eggs.**

A: Slope analysis of the rise of the third Ca<sup>2+</sup> transient evaluated and compared between WT (black dots) and dKO (red dots) eggs; WT:  $0.0218 \pm 0.01$ ; dKO:  $0.00765 \pm 0.003$  ( $p > 0.05$ ),  $n = 6$  in both groups. B: Area under third Ca<sup>2+</sup> transient; WT (black dots):  $2.33 \pm 0.27$  AU ( $n = 6$ ) vs. tKO (blue dots):  $3.36 \pm 1.04$  AU ( $n = 6$ ),  $p < 0.05$  vs. dKO (red trace):  $2.9 \pm 0.53$  AU ( $n = 6$ ),  $p < 0.05$ . C-D: Rate of protein translation measured by fluorescence intensity via injection of fluorescently tagged CaMKII construct after 2h (C) and 4h (D). Intensity was measured at 360 nm. B: WT (black dots):  $469.4 \pm 0.52$  nm,  $n = 28$  vs. dKO (red dots):  $599.5 \pm 0.51$  nm,  $n = 22$  ( $p < 0.001$ ). E: WT (black dots):  $578.1 \pm 1.3$  nm,  $n = 45$  vs. dKO (red dots):  $825 \pm 3.8$  nm,  $n = 45$ . F: Total number of Ca<sup>2+</sup> transients in response to IVF; WT (black dots):  $5.4 \pm 2.8$  oscillations ( $n = 20$ ) vs. dKO (red dots):  $1.97 \pm 0.64$  oscillations ( $n = 37$ ),  $p < 0.001$ . E: Time to first Ca<sup>2+</sup> transient in response to IVF; WT (black dots):  $22.6 \pm 9.0$  min ( $n = 20$ ) vs. dKO (red dots):  $33.4 \pm 17.9$  min ( $n = 37$ ),  $p < 0.05$ .

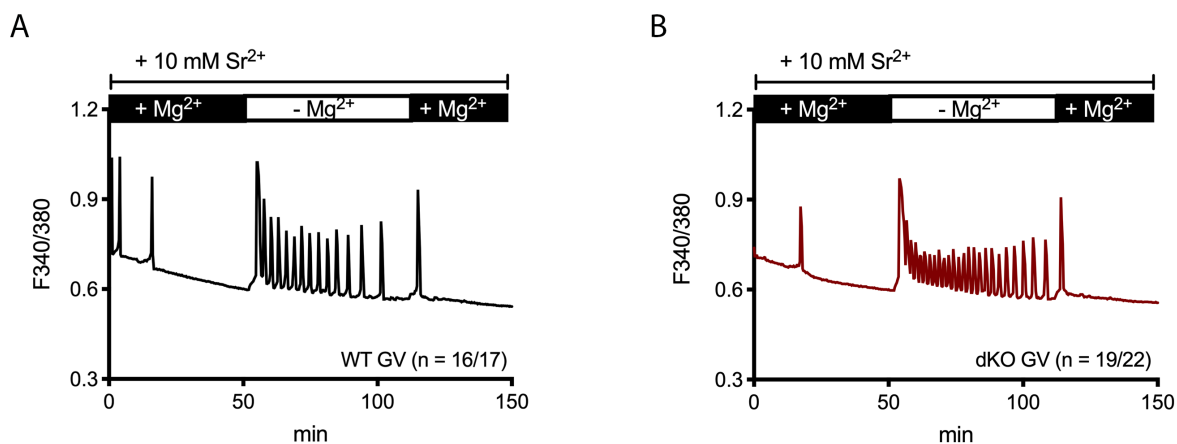

**Figure S7: Changes in  $[Mg^{2+}]_o$  greatly affect  $Sr^{2+}$  induced oscillations in GV oocytes.**

A-B: Spontaneous oscillations induced in GV oocytes by 10 mM  $SrCl_2$ . A: WT mean  $\pm$  S.E.M.  $Mg^{2+}$ -free =  $9.41 \pm 1.1$  oscillations,  $n = 9/9$ . B: dKO mean,  $Mg^{2+}$ -free =  $11.3 \pm 1.6$  oscillations,  $n = 7/9$ ,  $p > 0.05$ .  $[Mg^{2+}]_o$  was changed via perfusion of media throughout continuous imaging.
